# Supplementary material
Source: bioRxiv or medRxiv preprint supplement (https://www.biorxiv.org/highwire/filestream/59367/field_highwire_adjunct_files/0/195305-1.pdf)
Supplement: Supplementary file [file 195305-1.pdf]

## Extended data

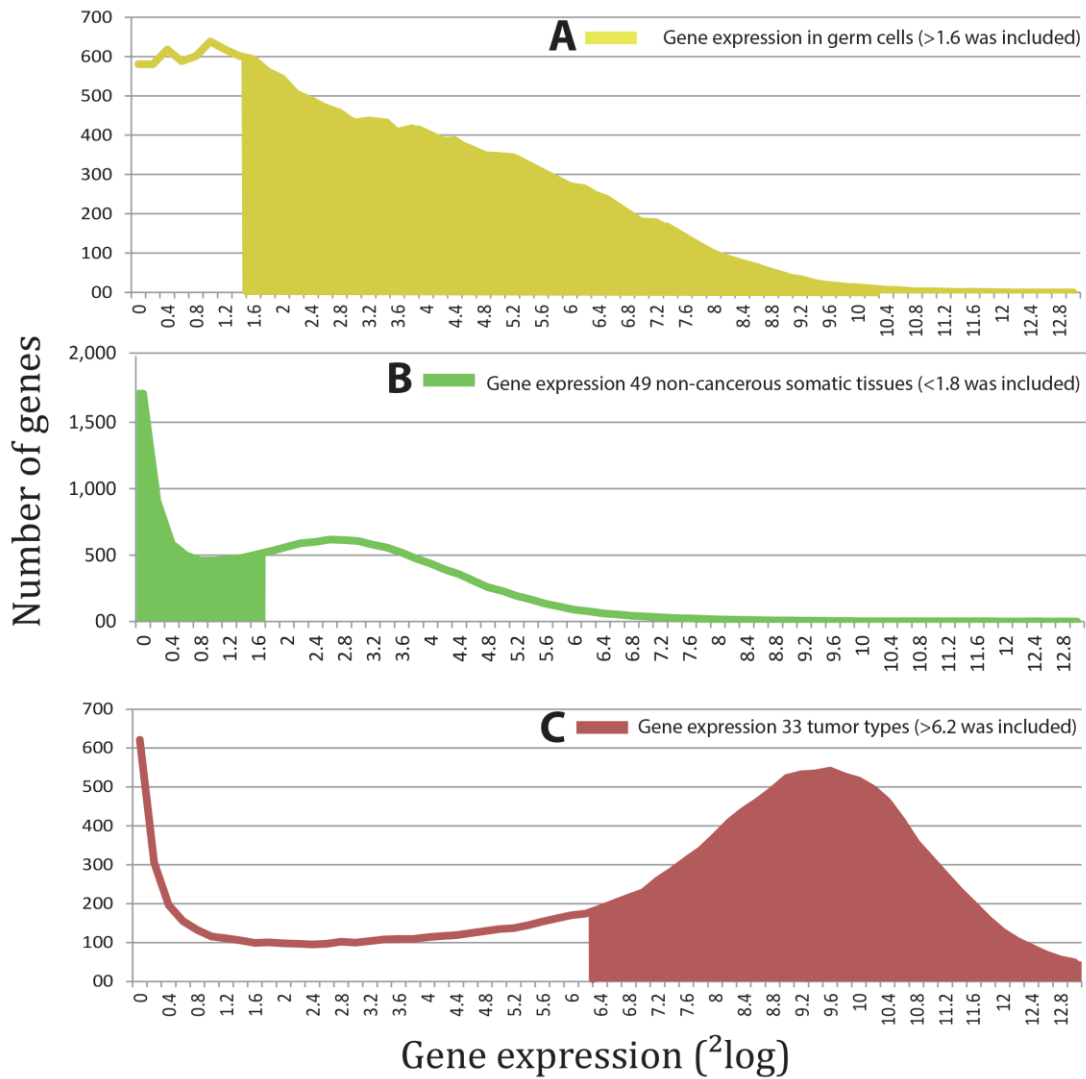

**Extended data 1. Selection of genes based on gene expression in three datasets.** Yellow: gene expression in germ cells (minimum <sup>2</sup>log expression for inclusion: 1,6). Green: gene expression in 49 non-cancerous somatic tissues (maximum <sup>2</sup>log expression for inclusion: 1,8). Red: gene expression in 33 tumor types (minimum <sup>2</sup>log expression for inclusion: 6,2).

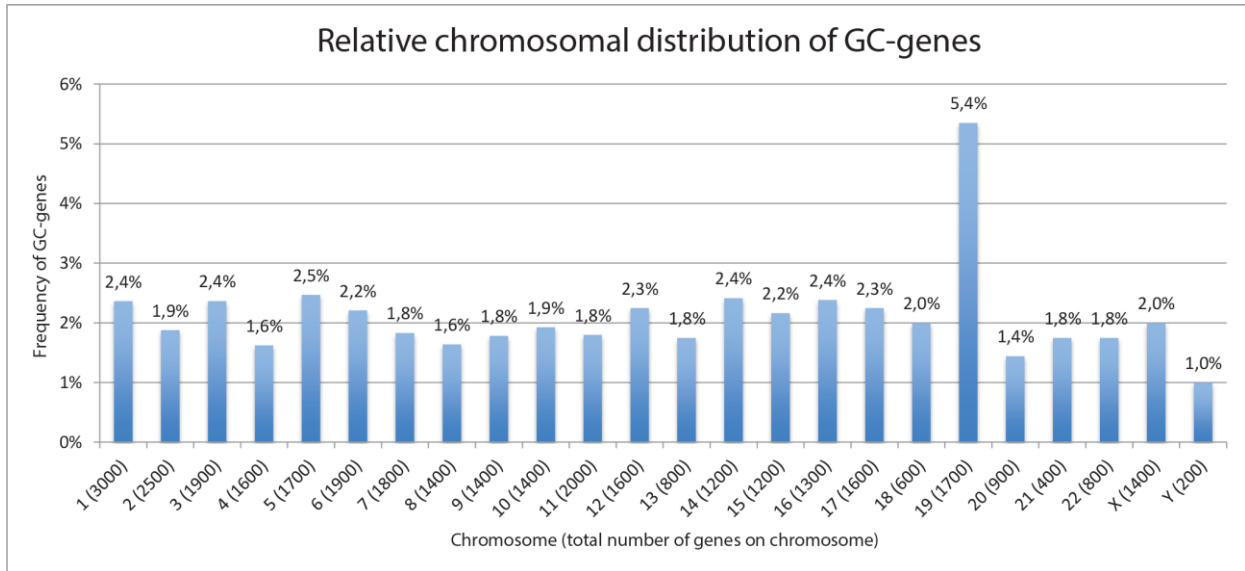

**Extended data 2. GC-genes are distributed evenly across chromosomes.** Relative chromosomal distribution of germ cell specific cancer (GC) genes. The percentage shows the number of GC-genes divided by the total number of genes on that chromosome.
